# Supplementary material
Source: PubMed Central journal article supplement (PMC3553828)
Supplement: JB.01517-12_zjb999092373so1.pdf [file JB.01517-12_zjb999092373so1.pdf]

## SUPPLEMENTAL MATERIAL

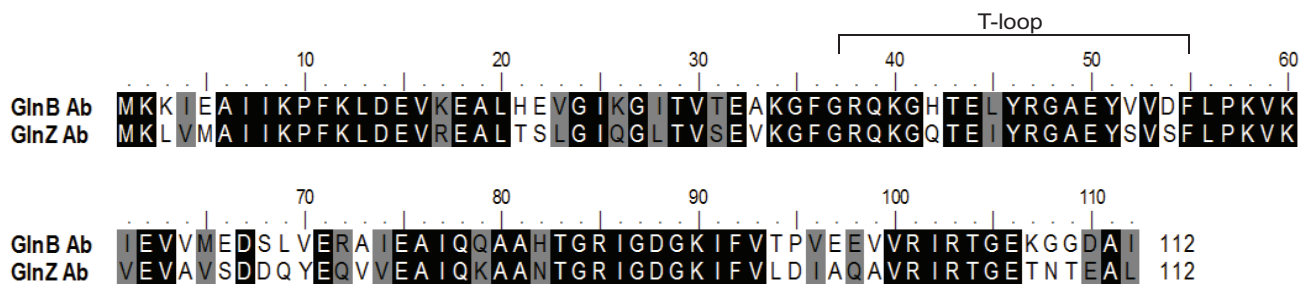

**FIGURE S1. Alignment of P<sub>II</sub> amino acids sequence for *A. brasilense* GlnB and GlnZ.** The position of the T-loop is indicated above the alignment, the identical and similar residues are identified by black and grey shading, respectively.

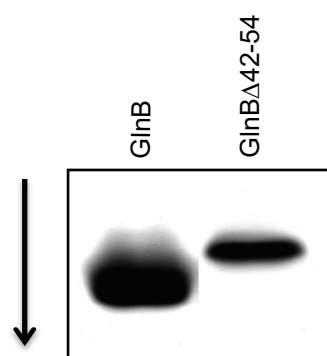

**FIGURE S2. Migration profile of GlnB and GlnB $\Delta$ 42-54 variant on native-PAGE (7.5%).** The gel was stained with Coomassie blue. The arrow indicate the migration direction from the negative to the positive pole. The slightly reduced migration of the GlnB $\Delta$ 42-54 in comparison to the wild-type GlnB is a result of increased net positive charge as expected based on the GlnB primary sequence analysis.

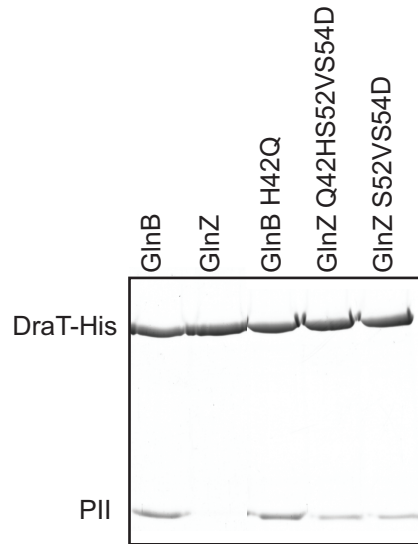

**FIGURE S3. *In vitro* interaction between His-tagged DraT and various P<sub>II</sub> mutant proteins.**

Complex formation was assessed by co-precipitation using Ni<sup>2+</sup> beads. Reactions were performed in the presence of 1 mM ADP. Binding reactions were conducted in 500  $\mu$ l of buffer adding His-tagged DraT 5  $\mu$ g and the indicated purified P<sub>II</sub> protein (10  $\mu$ g). The eluted fractions was subjected to SDS-PAGE and the gels were Coomassie blue stained.

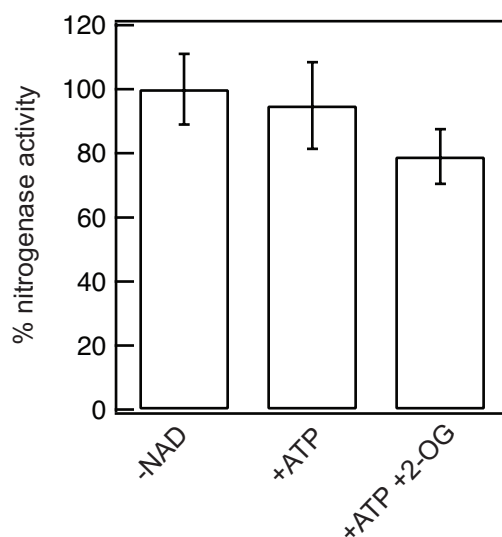

**FIGURE S4. Effect of ATP and 2-oxoglutarate without ADP on the activity of the DraT-GlnB complex.** DraT activity was assessed indirectly by Fe protein activity measuring the hydrogen evolution. Reactions for DraT assay contained 4 mM MgCl<sub>2</sub>, 2 mM ATP, 2 mM 2-OG, co-purified DraT-GlnB complex, 100 μg *A. vinelandii* Fe protein and the effectors as indicated. For the control, the reaction was performed in the presence of co-purified DraT-GlnB complex, 2 mM ATP or ADP in the absence of NAD<sup>+</sup>. The DraT activity was stopped by reducing the NAD<sup>+</sup> using dithionite solution. The Fe protein activity was determined adding 500 μg of MoFe protein and the hydrogen production was measured.

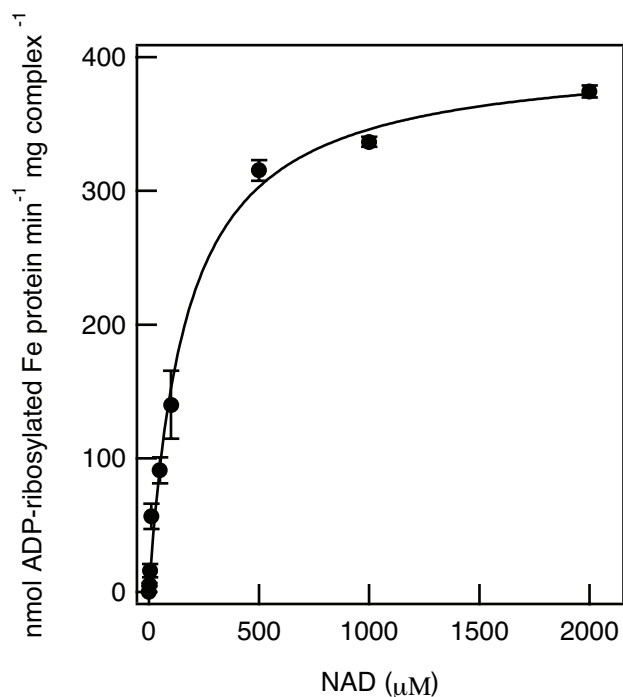

**FIGURE S5. Determination of the  $K_m$  for  $NAD^+$  using the DraT-GlnB complex.** ADP-ribosylation of *Azotobacter vinelandii* Fe protein. Complex reactions contained different  $NAD^+$  concentrations, 1 mM  $MgCl_2$ , DraT-GlnB complex, 1 mM ADP and 100  $\mu g$  Fe protein were incubated 5 min, 130 rpm at 30°C. The reactions were performed using Fe protein:DraT-GlnB complex molar ratio of 125:1. For the control, the reaction was performed in the presence of either co-purified complex or DraT in the absence of  $NAD^+$ . The DraT activity was stopped reducing the  $NAD^+$  using dithionite solution. The Fe protein activity was determined adding 500  $\mu g$  of MoFe protein and hydrogen production was measured. The  $K_m$  ( $166 \pm 24 \mu M$ ) and  $V_{max}$  ( $403 \pm 15 \text{ nmol ADP-ribosylated Fe protein min}^{-1} \text{ mg complex}^{-1}$ ) values were determined using Igor Pro program).

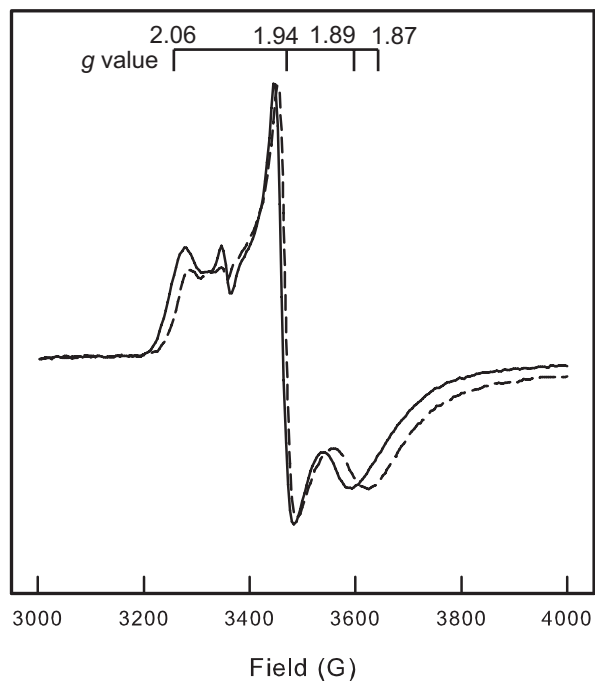

**FIGURE S6. EPR Spectra of *Azotobacter vinelandii* wild type Fe protein and ADP-ribosylated Fe protein.** Unmodified and ADP-ribosylated Fe protein (dashed line) samples were maintained in the reduced state by the presence of 2 mM dithionite. Spectra were recorded at 12 K, 9.50 GHz, and 1 mW microwave power. The g value for the each peak is shown.
